# Supplementary material for: Irradiation Selects for p53-Deficient Hematopoietic Progenitors
Source: PubMed Central journal article supplement (PMC2830447; doi:10.1371/journal.pbio.1000324), 2010-03-02

Figure S3

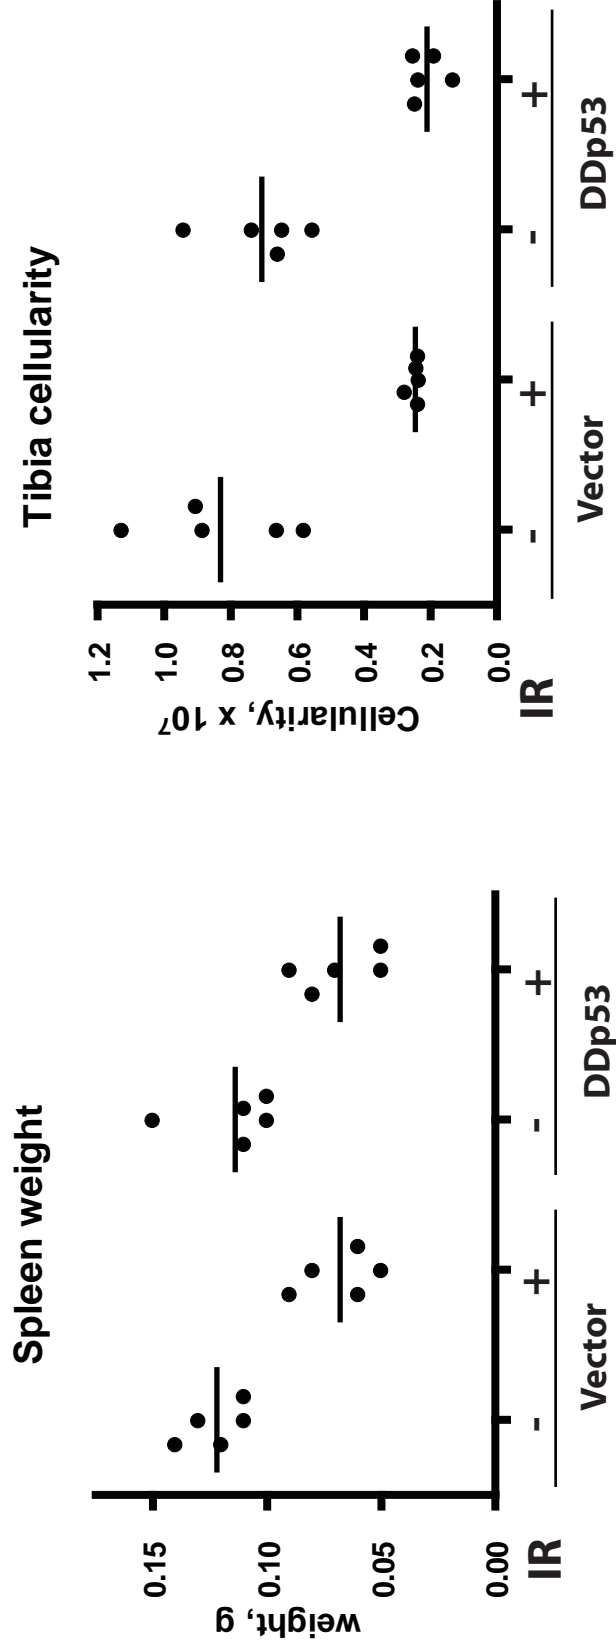

Supplement: pbio.1000324.s003.pdf [file pbio.1000324.s003.pdf]
