# Supplementary material for: Irradiation Selects for p53-Deficient Hematopoietic Progenitors
Source: PubMed Central journal article supplement (PMC2830447; doi:10.1371/journal.pbio.1000324), 2010-03-02

# WT mock

## Figure S6A

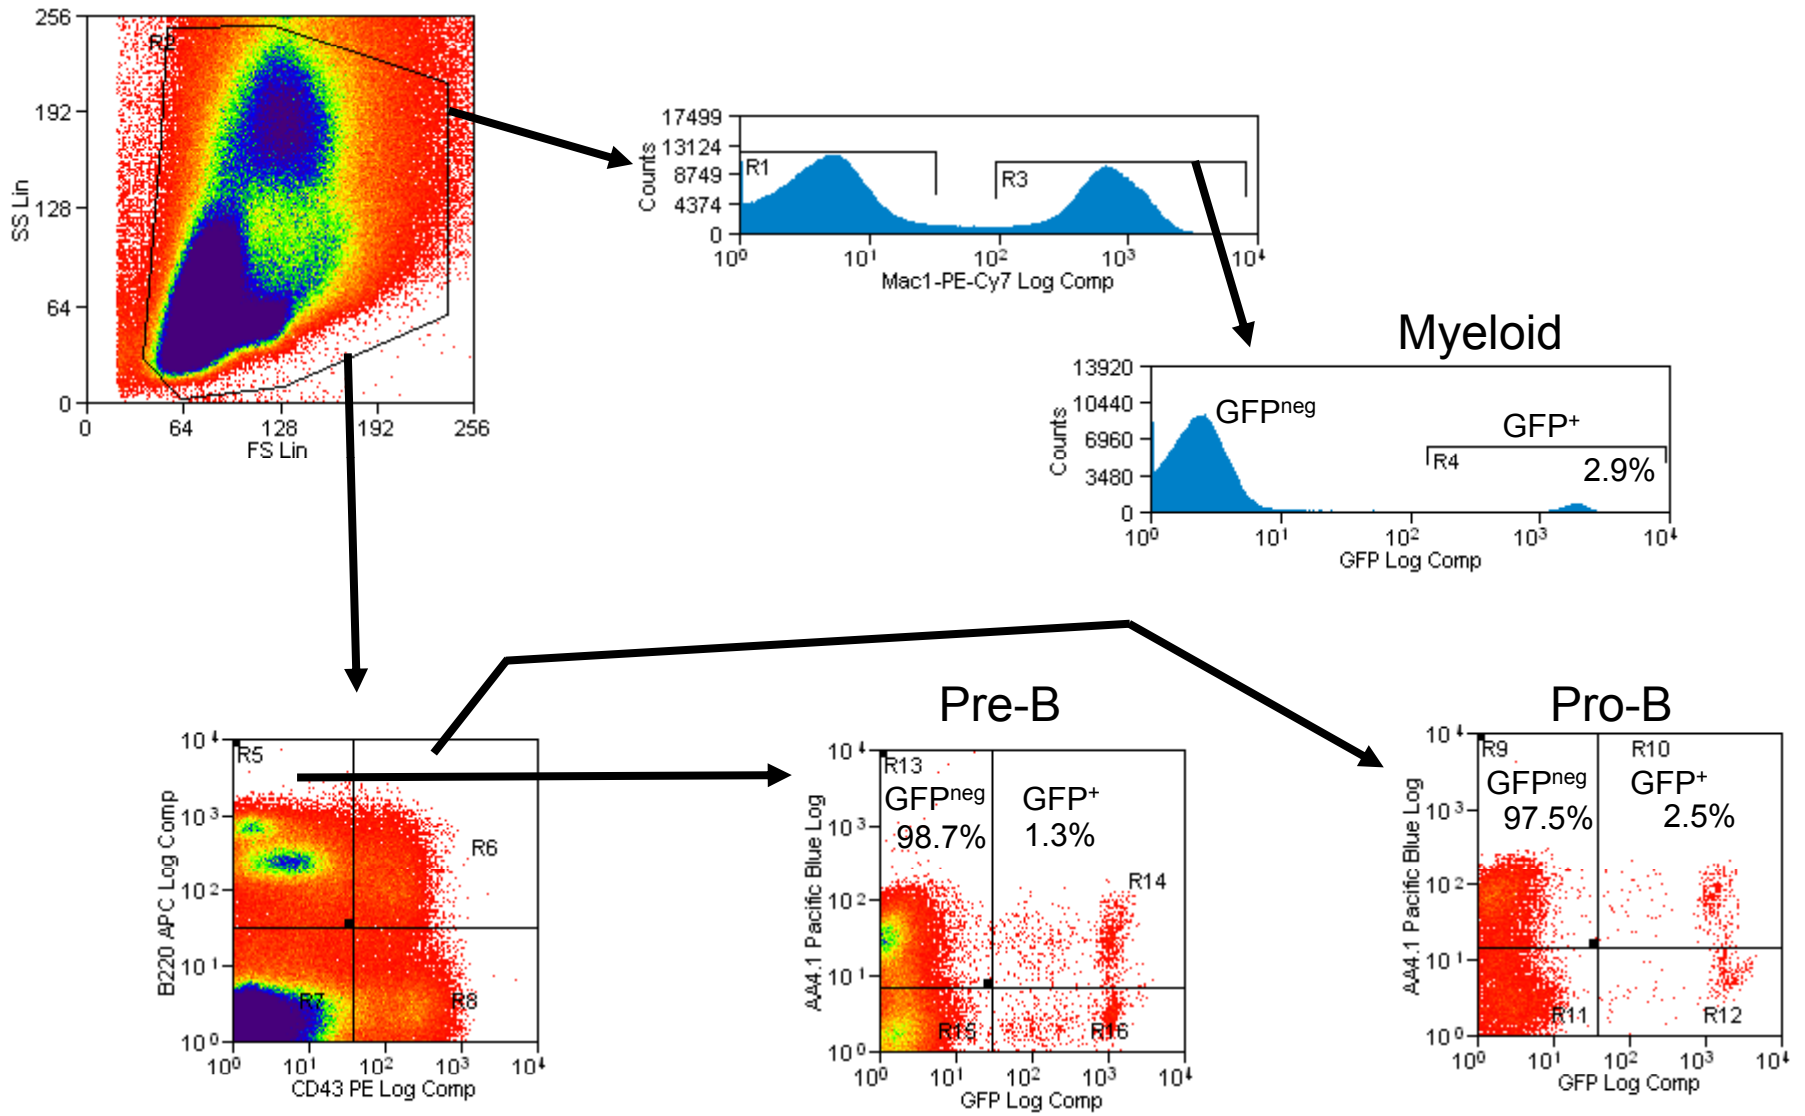

# WT Irradiated

## Figure S6B

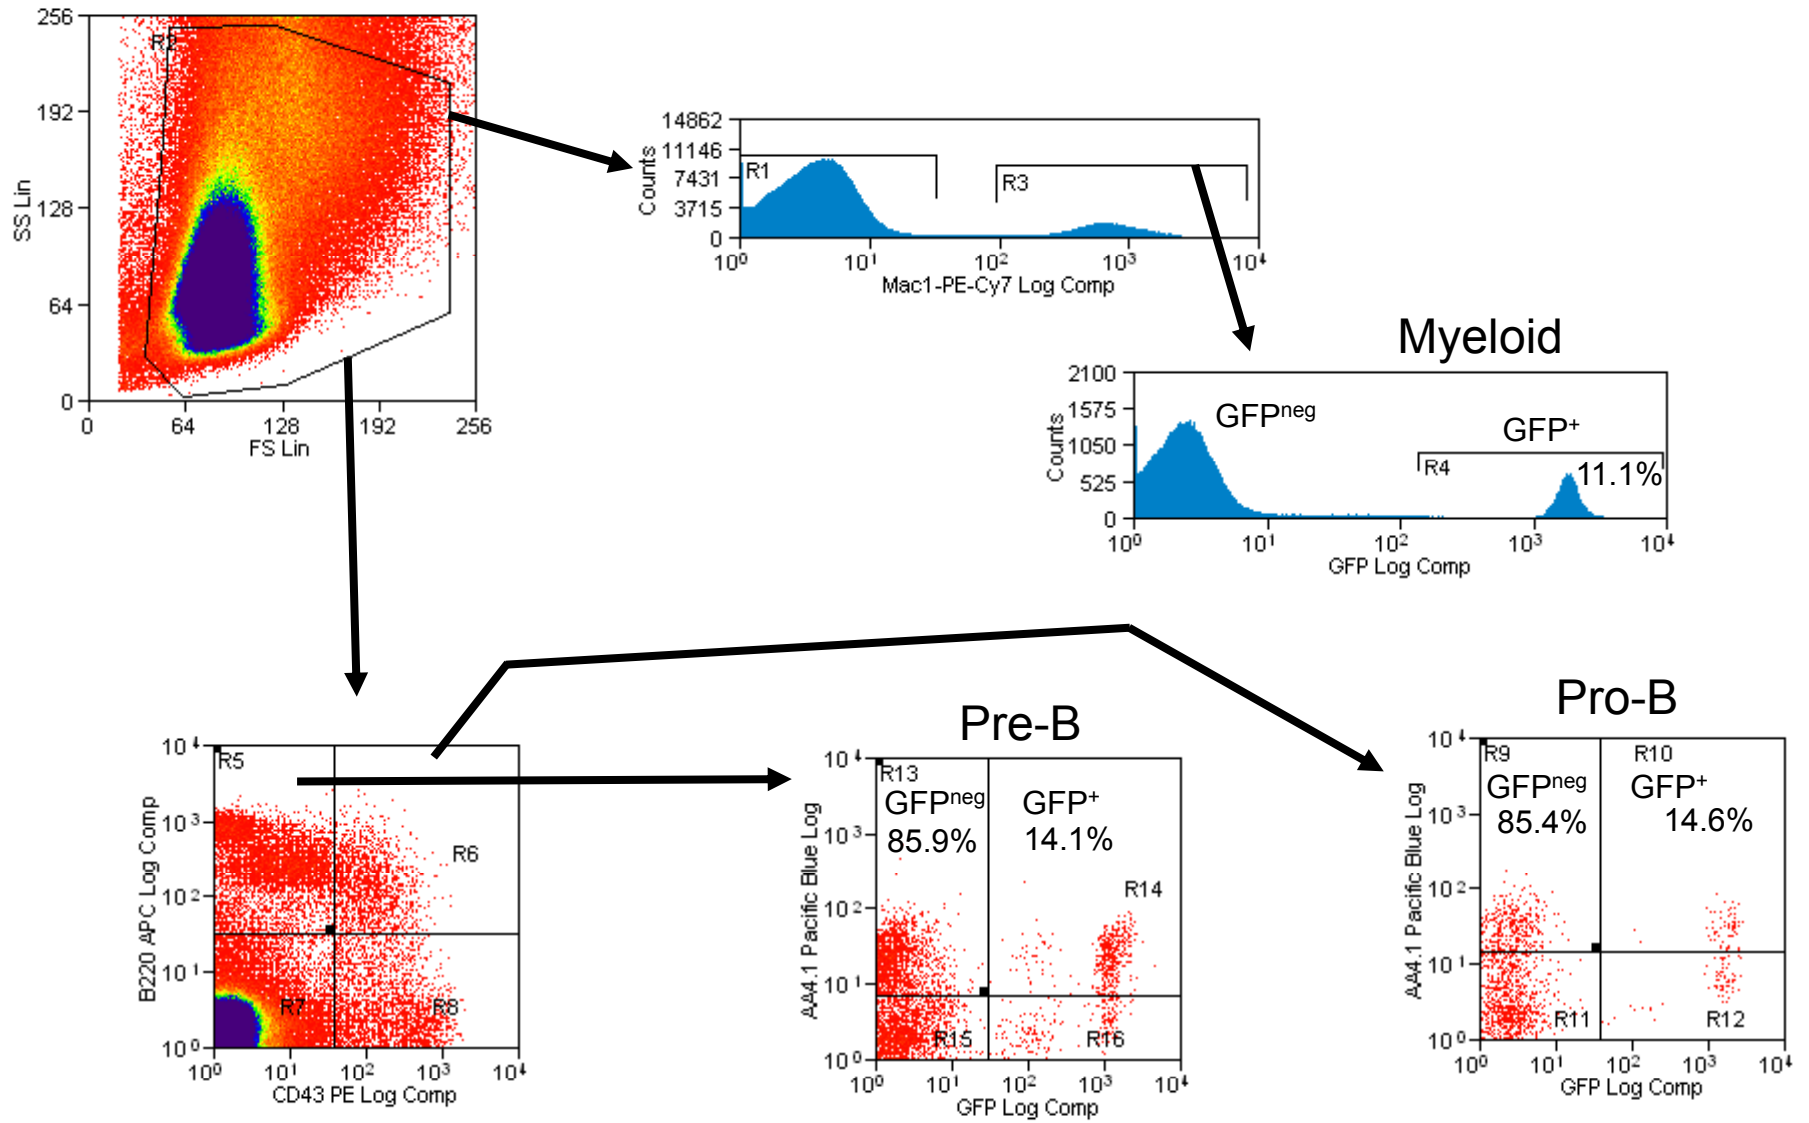

p53<sup>-/-</sup> mock

Figure S6C

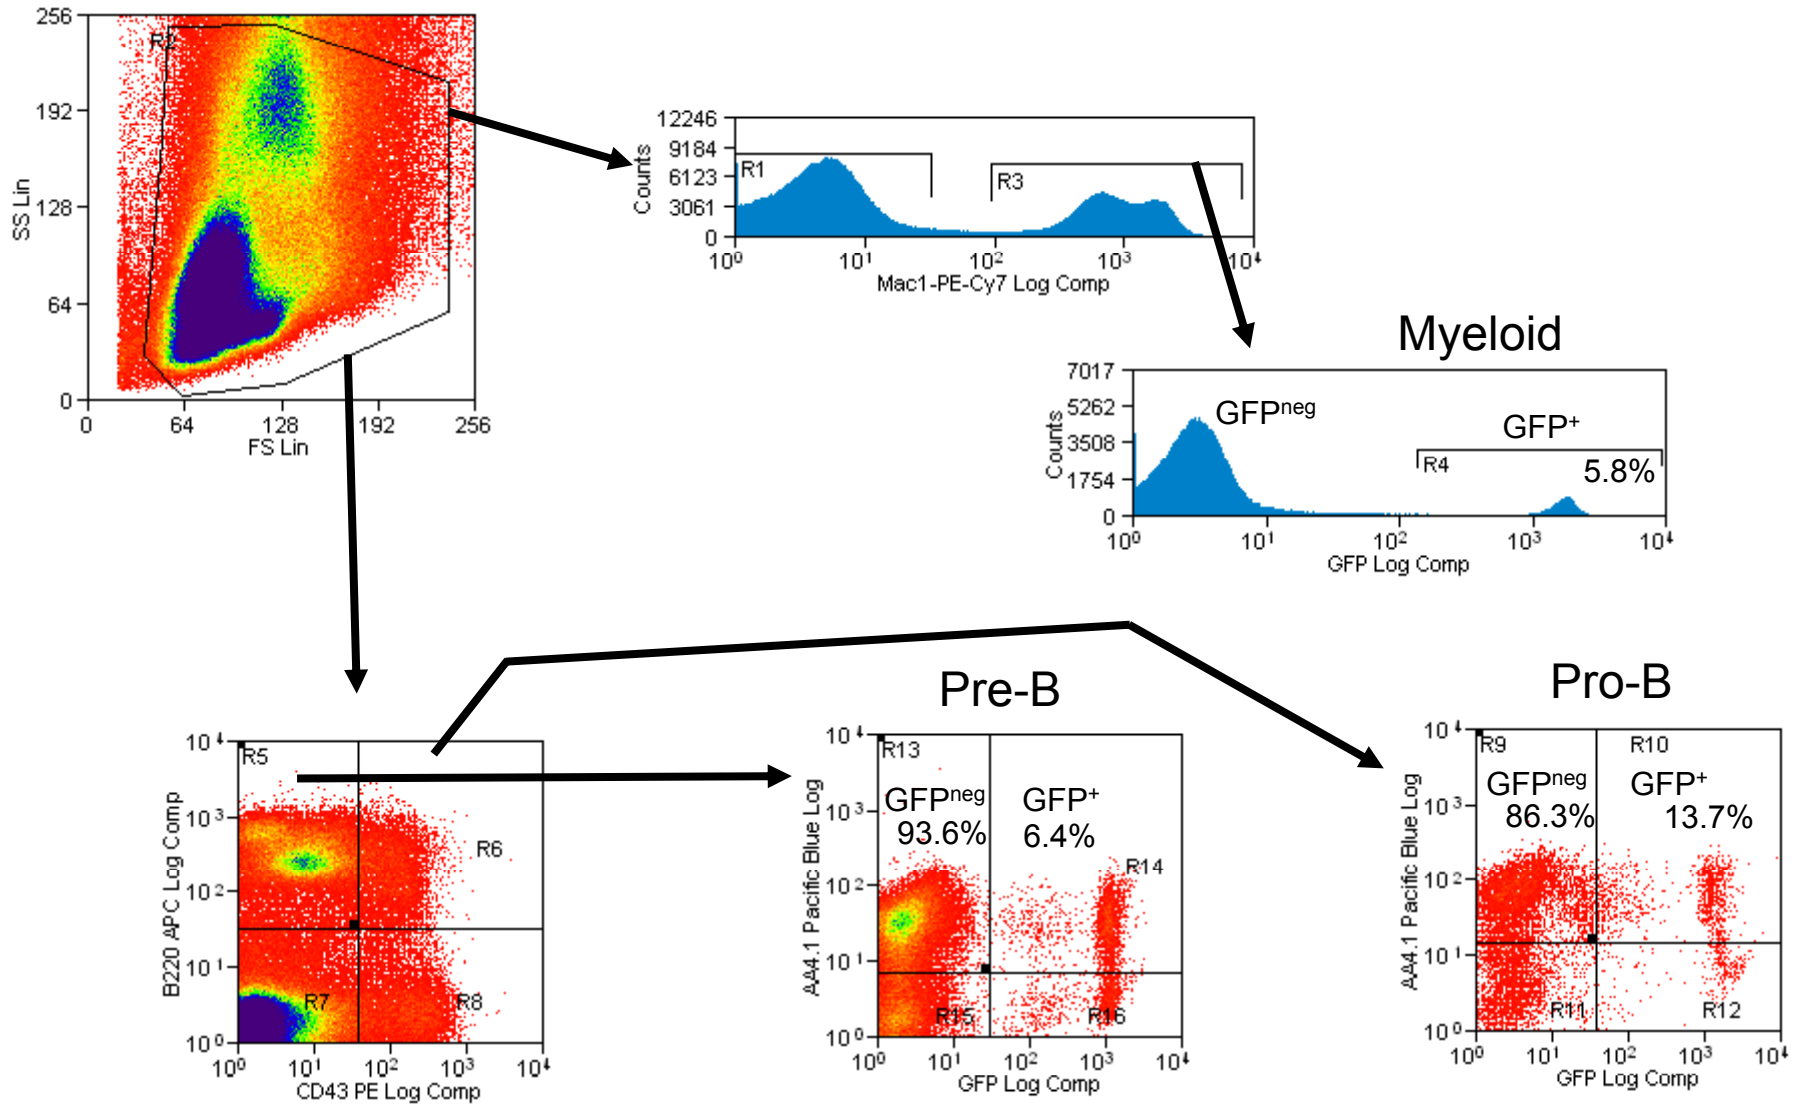

# p53<sup>-/-</sup> Irradiated

## Figure S6D

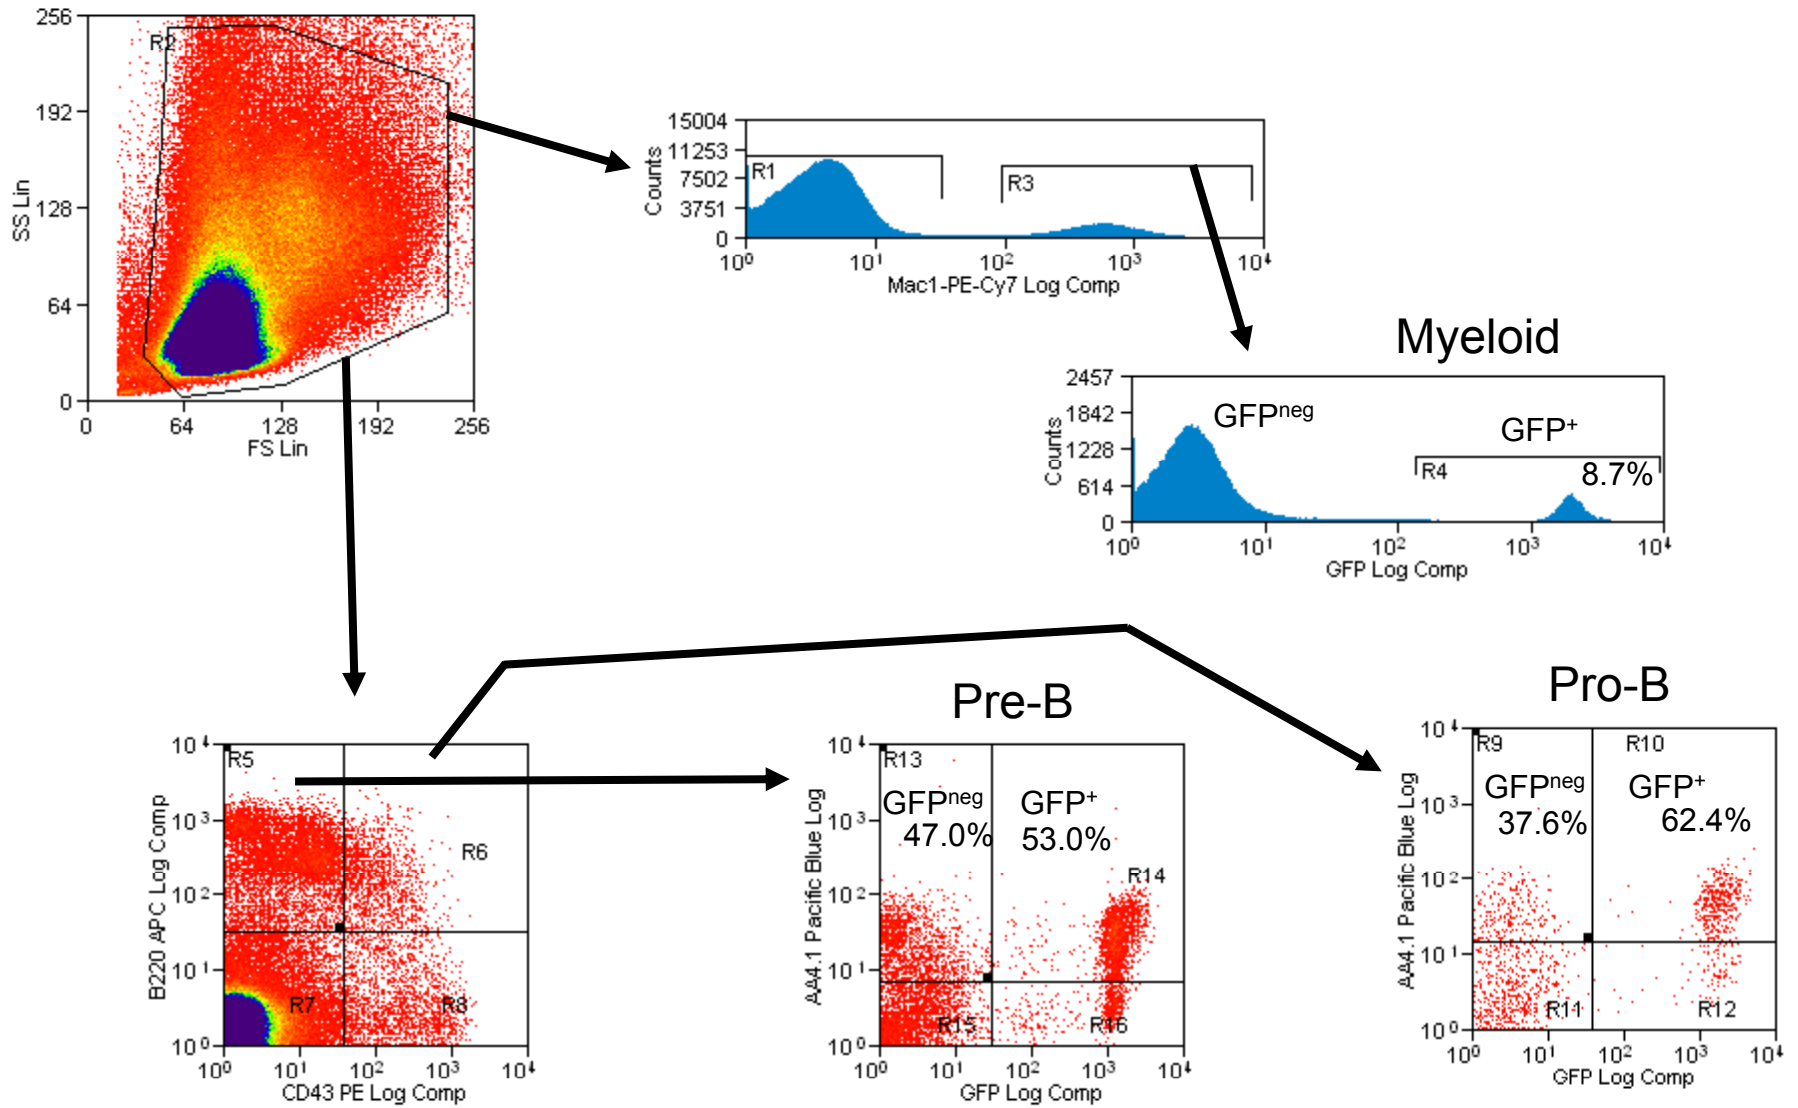

Figure S6E

**p53<sup>-/-</sup> mock**

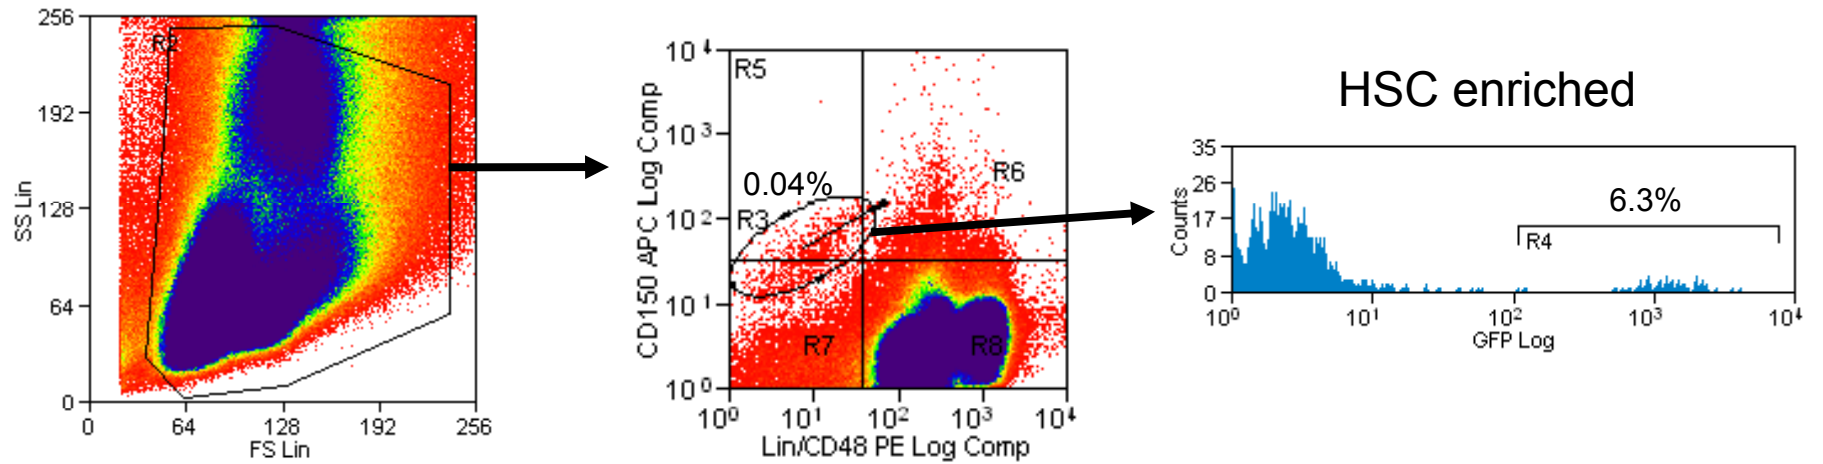

**p53<sup>-/-</sup> Irradiated**

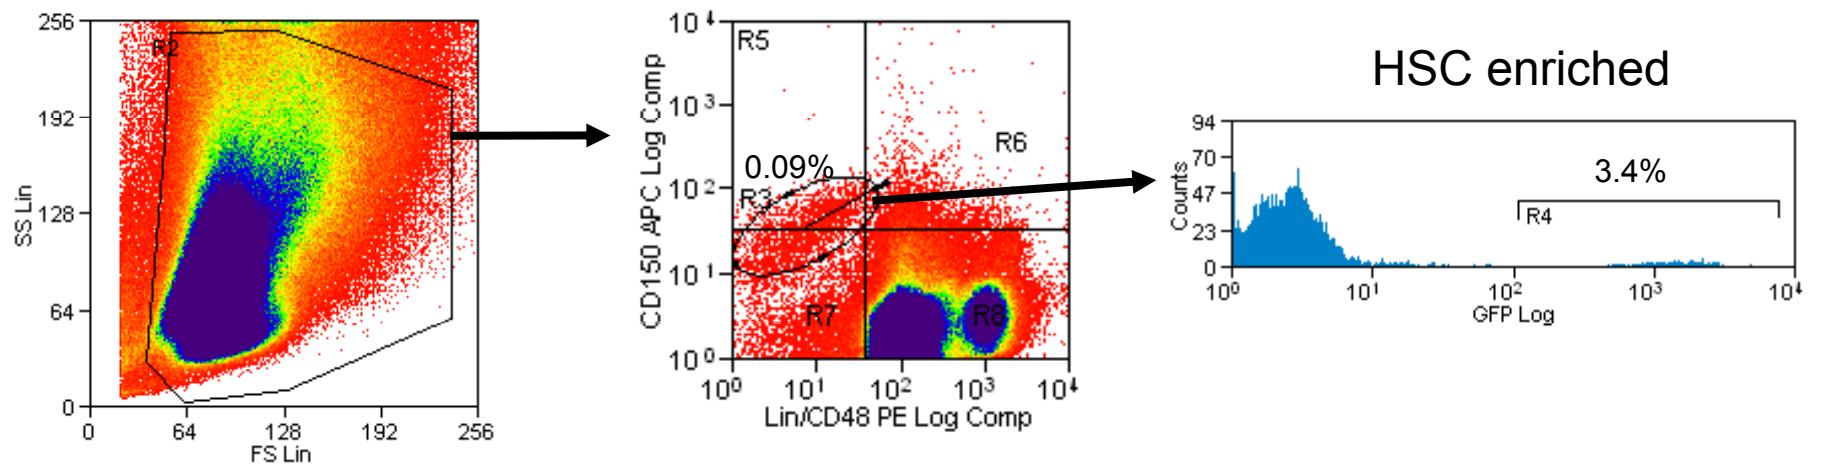

Supplement: pbio.1000324.s006.pdf [file pbio.1000324.s006.pdf]
